# Supplementary material for: HER2-Targeted Antibody–Drug Conjugates Display Potent Antitumor Activities in Preclinical Extramammary Paget’s Disease Models: In Vivo and Immunohistochemical Analyses
Source: MDPI journal article supplement (doi:10.3390/cancers14143519), 2022-07-20
Supplement: s1 [file s1]

Supplemental information

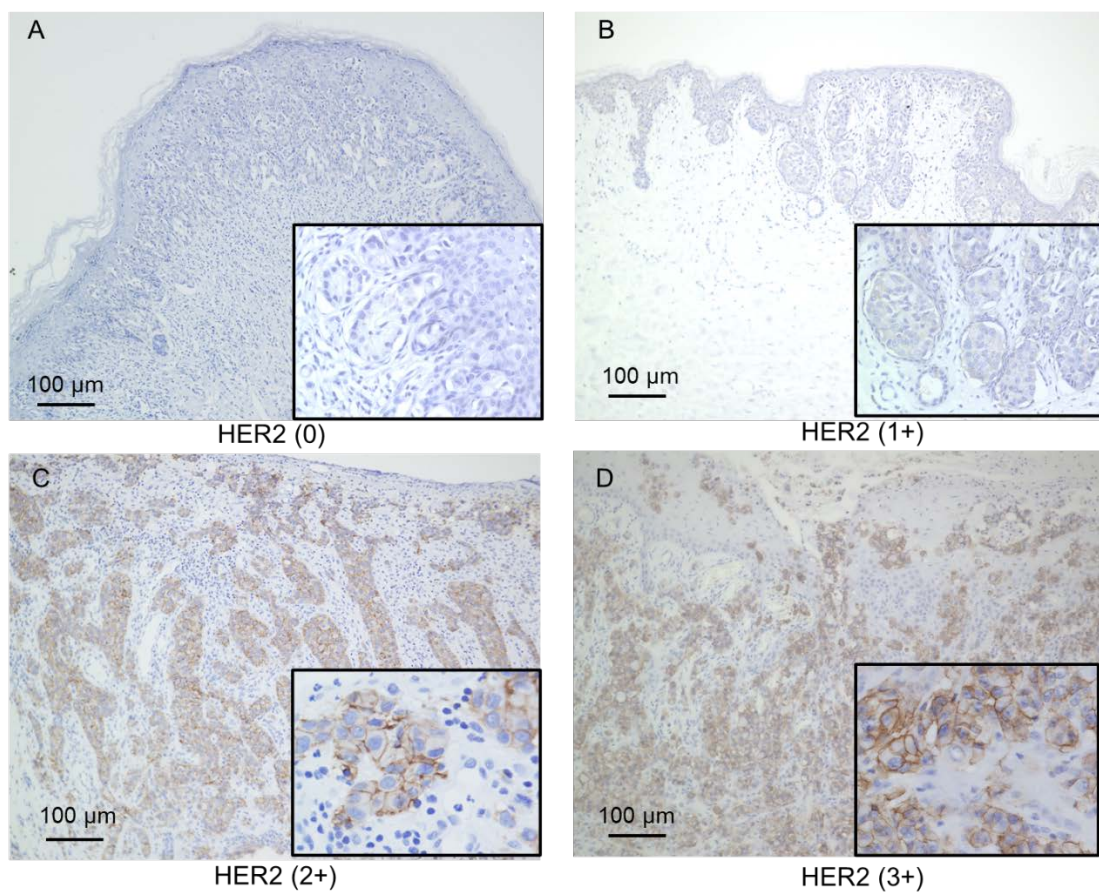

**Supplemental Figure S1. Representative images of HER2 immunostaining.**

A representative image is shown for each score (scale bar = 100 μm).

(A) HER2 (0); (B) HER2 (1+); (C) HER2 (2+); (D) HER2 (3+).

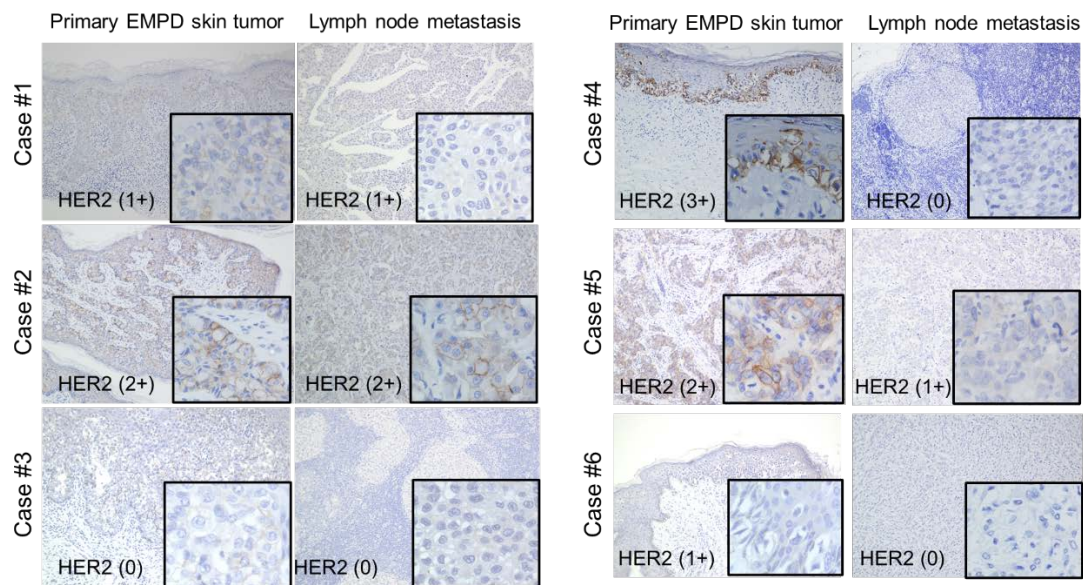

**Supplemental Figure S2. Levels of HER2 expression in lymph node metastases are not identical to those in the corresponding primary skin tumors.**

The present study includes six EMPD cases with lymph node metastasis. We assessed the HER2 expression of the primary sites and lymph node metastasis in these cases. Three of the six cases show no difference in HER2 expression between the primary site and the lymph node metastasis (left column, Cases #1–#3). The other three cases show lower HER2 expression in lymph node metastasis than in the primary site (right column, Cases #4–#6).

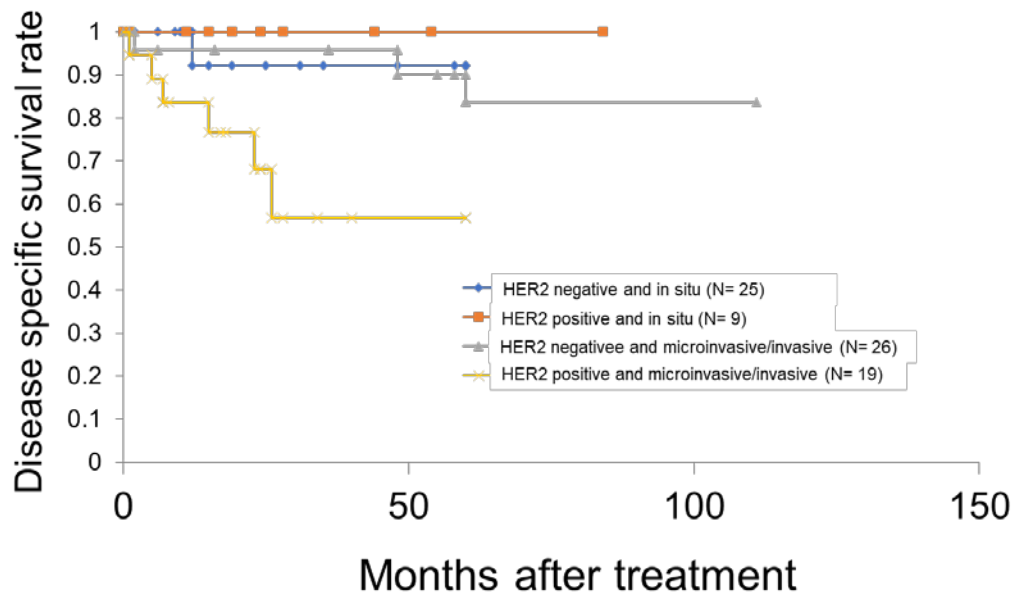

**Supplemental Figure S3. A significant correlation is observed between HER2-positive immunostaining and disease-specific survival.**

We assessed the prognosis (disease-specific survival) based on HER2 status as well as EMPD pathology. The patients were divided into four groups: 1: microinvasive/invasive cases with positive HER2 immunostaining (N = 19), 2: *in situ* cases with positive HER2 immunostaining (N = 9), 3: microinvasive/invasive cases with negative HER2 immunostaining (N = 26), and 4: *in situ* cases with negative HER2 immunostaining (N = 25). Kaplan–Meier curves of disease-specific survival for the patients are shown. The disease-specific survival is significantly worse for microinvasive/invasive cases with positive HER2 immunostaining than for *in situ* cases with negative HER2 immunostaining or microinvasive/invasive cases with negative HER2 immunostaining ( $p = 0.04$ ,  $p = 0.021$ , respectively, log-rank test).

**Supplemental figure table S1; EMPD Cases treated with HER2-targeted therapies**

| Reference       | No. of patients | Treatment                                                                | HER2 IHC       | HER2 mutation         | Response         | Outcome (months)     |
|-----------------|-----------------|--------------------------------------------------------------------------|----------------|-----------------------|------------------|----------------------|
| 13. Vornicova   | 1               | lapatinib                                                                | negative       | S310F                 | PR               | PFS:12+              |
| 14. Karam       | 1               | trastuzumab                                                              | 3+             | unknown               | PR               | PFS: 12              |
| 15. Takahagi    | 1               | trastuzumab + paclitaxel                                                 | positive       | unknown               | PR               | PFS: 17, OS: 25      |
| 16. Hanawa      | 1               | trastuzumab + paclitaxel                                                 | 3+             | unknown               | PR               | PFS: 13              |
| 17. Wakabayashi | 1               | trastuzumab                                                              | 3+             | unknown               | PR               | PFS: 12+             |
| 18. Yoshimura   | 1               | trastuzumab + taxianes                                                   | 3+             | unknown               | PR               | PFS:4                |
| 19. Barth       | 1               | trastuzumab                                                              | 3+             | none                  | CR               | PFS: 12              |
| 20. Zhang       | 1               | trastuzumab                                                              | overexpression | unknown               | PR               | PFS:15+              |
| 21. Shin        | 1               | trastuzumab + docetaxel + carboplatin<br>followed by lapatinib and T-DM1 | overexpression | unknown               | CR               | PFS: almost 12+      |
| 22. Watanabe    | 1               | trastuzumab + docetaxel + pertuzumab                                     | overexpression | unknown               | PR               | PFS:12               |
| 23. Ichiyama    | 1               | trastuzumab + paclitaxel                                                 | positive       | unknown               | PR               | PFS: 24+             |
| 24. Nordmann    | 1               | trastuzumab + carboplatin                                                | 3+             | S310F                 | near CR          | PFS: 7.5             |
| 25. Lu          | 2               | trastuzumab+paclitaxel + cisplatin                                       | 3+             | none                  | CR               | PFS:17               |
|                 |                 | trastuzumab + paclitaxel                                                 | 2+             | genetic heterogeneity | SD               | PFS:5                |
| 26. Sekiguchi   | 4               | trastuzumab + paclitaxel                                                 | 3+:2, 2+:2     | unknown               | PR(1/4), PD(3/4) | MPFS: 5.3, MOS: 12.0 |
| 27. Bartoletti  | 4               | trastuzumab + paclitaxel                                                 | positive       | unknown               | CR(2/4), PR(2/4) | MDOR: 10 (2–34)      |
| 28. Bruce       | 1               | trastuzumab                                                              | positive       | unknown               | CR               | PFS:12+              |
| 29. Guo         | 1               | pyrotinib                                                                | unknown        | R678Q/S310Y/S310F     | PR               | PFS: 2+              |

CR, complete response; PR, partial response; SD, progressive disease; PFS, progression-free survival; MPFS, median progression-free survival; OS, overall survival; MOS, median overall survival; +, ongoing response; MDOR, median duration of response
